# Supplementary material for: Efficiency of mining rock wastes in the removal of toxic heavy metal ions (Pb²⁺, Cu²⁺, and Cd²⁺) from contaminated water solutions
Source: Research Square preprint supplement (doi:10.21203/rs.3.rs-7931109/v1), 2025-11-13
Supplement: Supplementary file 1 [file c558f5cc98a873fea361d0e0.docx]

*Table 1.* Cd, Cu and Pb heavy metals concentration standards for soil and irrigation water for agriculture as per WHO/FAO (2007) and drinking water as per the WHO (2011) and USEPA (2002).

| **Heavy metals** | **WHO/FAO in mg/L [15]** | | **Drinking water in µg/L/** | |
| --- | --- | --- | --- | --- |
| **Soil** | **Irrigation water** | **WHO [16]** | **USEPA [17]** |
| **Cd** | 2.25±0.19 | 0.1 | 3 | 5 |
| **Cu** | 28.1±1.8 | 0.2 | 2000 | 1360 |
| **Pb** | 11.31±1.45 | 5 | 10 | 15 |

*Table.2. Major oxides analysis of the phosphatic dolomite(PD) sample.*

| **P2O5%** | **SiO2%** | **Al2O3%** | **CaO%** | **F%** | **MgO%** | **SO3%** | **Na2O%** | **K2O%** | **LOI%** |
| --- | --- | --- | --- | --- | --- | --- | --- | --- | --- |
| 8.97 | 1.52 | 1.28 | 35.15 | 0.91 | 10.54 | 4.36 | 0.27 | 0.07 | 31.33 |

***Table 3.*** *The optimum conditions for the removal of Pb2+, Cu2+, and Cd2+ ions onto phosphatic dolomite and sodalite adsorbents.*

| Heavy metal | Optimum Conditions | Phosphatic dolomite  (PD) | Sodalite  (SBPD) |
| --- | --- | --- | --- |
| Pb2+ | Adsorbent dosage (gm) | 0.4 | 0.2 |
|  | pH | 3 | 3 |
|  | Initial concentration (ppm) | 350 | 1000 |
|  | Contact time (min.) | 30 | 30 |
|  | Adsorbent dosage (gm) | 0.6 | 0.3 |
|  | pH | 4 | 4 |
| Cu2+ | Initial concentration (ppm) | 100 | 300 |
|  | Contact time (min.) | 30 | 30 |
|  | Adsorbent dosage (gm) | - | 0.3 |
| Cd2+ | pH | - | 3 |
| Initial concentration (ppm) | - | 200 |
| Contact time (min.) | - | 30 |

*.*

***Table 4.*** *Langmuir and Freundlich isotherml models parameters and correlation coefficients for Pb2+, Cu2+, and Cd2+ adsorption onto PD and SBPD.*

| **Heavy metal** | **Model** | **Parameters** | **Phosphatic dolomite (PD)** | **Sodalite**  **(SBPD)** |
| --- | --- | --- | --- | --- |
| **Pb2+** | Langmuir | qmax (mg/g) | 19.7 | 123.5 |
| KL (b) | 0.8 | 0.27 |
| RL | 0.005 - 0.002 | 0.004 – 0.002 |
| R2 | 0.9953 | 0.9987 |
| Freundlich | Kf | 13.41 | 120.1 |
| n | 16.02 | 416.7 |
| R2 | 0.9152 | 0.0147 |
| **Cu2+** | Langmuir | qmax (mg/g) | 2.74 | 11.5 |
| KL (b) | 0.03 | 0.27 |
| RL | 0.25 - 0.05 | 0.018 – 0.004 |
| R2 | 0.8748 | 0.9374 |
| Freundlich | Kf | 6.84 | 18.5 |
| n | -4.27 | 19.3 |
| R2 | 0.4378 | 0.4772 |
| **Cd2+** | Langmuir | qmax (mg/g) | - | 12.1 |
| KL (b) | - | 0.11 |
| RL | - | 0.083 – 0.025 |
| R2 | - | 0.9382 |
|  | Kf | - | 3.3 |
| Freundlich | n | - | 3.69 |
| R2 | - | 0.9787 |

*Table**5****.*** *Parameters of the studied pseudo-first-order and pseudo-second-order kinetic models of Pb, Cu, and Cd adsorption onto PD and SBPD.*

| **Heavy metal** | **Model** | **Parameters** | **Phosphatic dolomite (PD)** | **Sodalite (SBPD)** |
| --- | --- | --- | --- | --- |
| **Pb2+** | Pseudo-First-order | K1 (mg/g min) | - | 0.16 |
| qe (mg/g) | - | 61.1 |
| R2 | - | 0.8578 |
| Pseudo-Second-order | K2 (mg/g min) | 0.017 | 0.004 |
| qe (mg/g) | 22.5 | 131.6 |
| h (mg/g min) | 8.93 | 63.7 |
| R2 | 0.9905 | 0.9971 |
| **Cu2+** | Pseudo-First-order | K1 (mg/g min) | - | 0.13 |
| qe (mg/g) | - | 33.6 |
| R2 | - | 0.883 |
| Pseudo-Second-order | K2 (mg/g min) | 0.35 | 0.0008 |
| qe (mg/g) | 3.66 | 46.7 |
| h (mg/g min) | 4.68 | 1.8 |
| R2 | 0.9993 | 0.966 |
| **Cd2+** | Pseudo-First-order | K1 (mg/g min) | - | 0.026 |
| qe (mg/g) | - | 0.44 |
| R2 | - | 0.96 |
| Pseudo-Second-order | K2 (mg/g min) | - | 1.15 |
| qe (mg/g) | - | 8.01 |
| h (mg/g min) | - | 73.5 |
| R2 | - | 1 |

*Table 6. Parameters of intra-particle diffusion model of Pb, Cu and Cd adsorption onto PD and SBPD*

| **Heavy metal** | **Model** | **Parameters** | **Phosphatic dolomite (PD)** | **Sodalite**  **(SBPD)** |
| --- | --- | --- | --- | --- |
|  | Intra-  Particle diffusion | KIPD (mg/min1/2.g) | 1.98 | 10.5 |
| **Pb2+** | C | 10.95 | 72.06 |
|  | R2 | 0.9647 | 0.7848 |
|  | Intra-  Particle diffusion | KIPD (mg/min1/2.g) | 0.16 | 4.17 |
| **Cu2+** | C | 2.8 | 1.6 |
|  | R2 | 0.6845 | 0.8984 |
|  | Intra-  Particle diffusion | KIPD (mg/min1/2.g) | - | 0.08 |
| **Cd2+** | C | - | 7.6 |
|  | R2 | - | 0.9526 |
